# Supplementary material
Source: PubMed Central journal article supplement (PMC4873431)

Fig S1

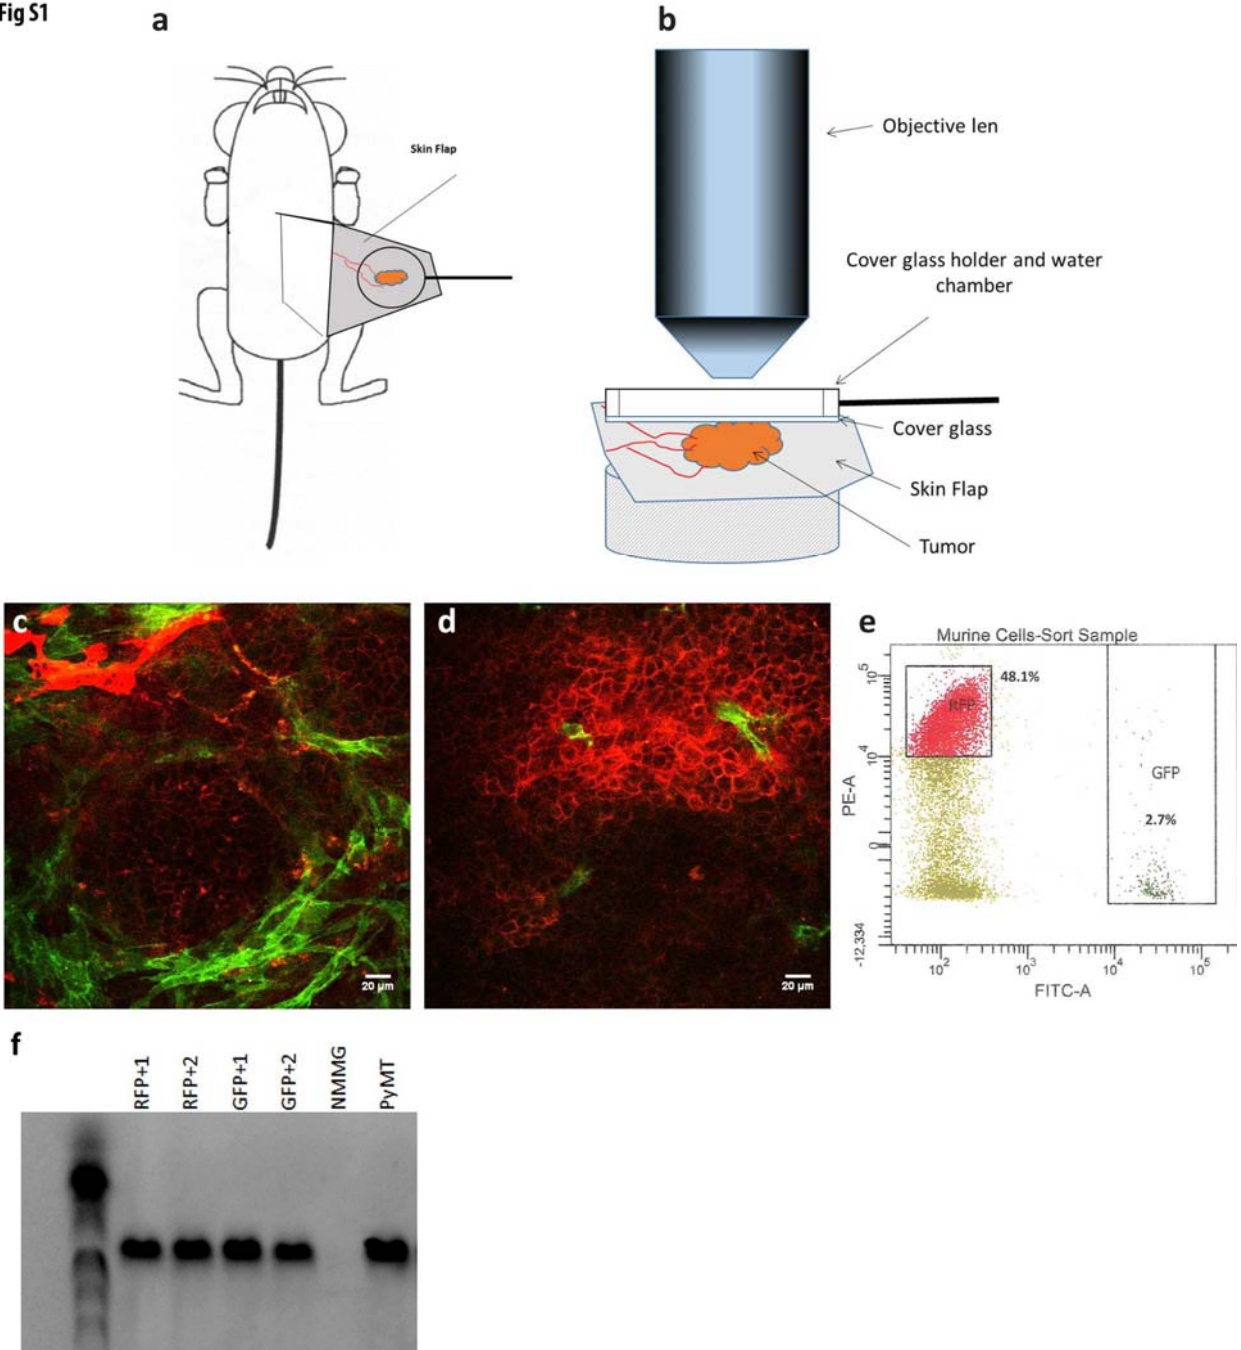

Fig S2

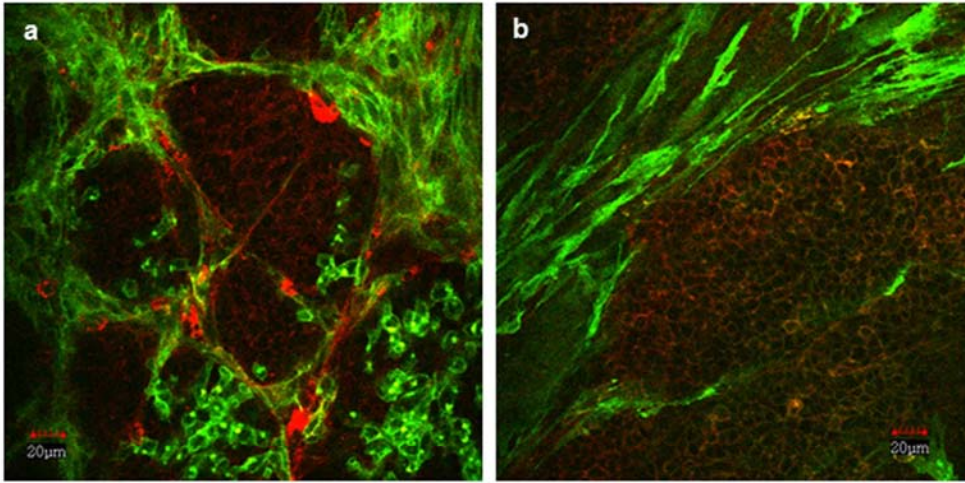

Fig S3

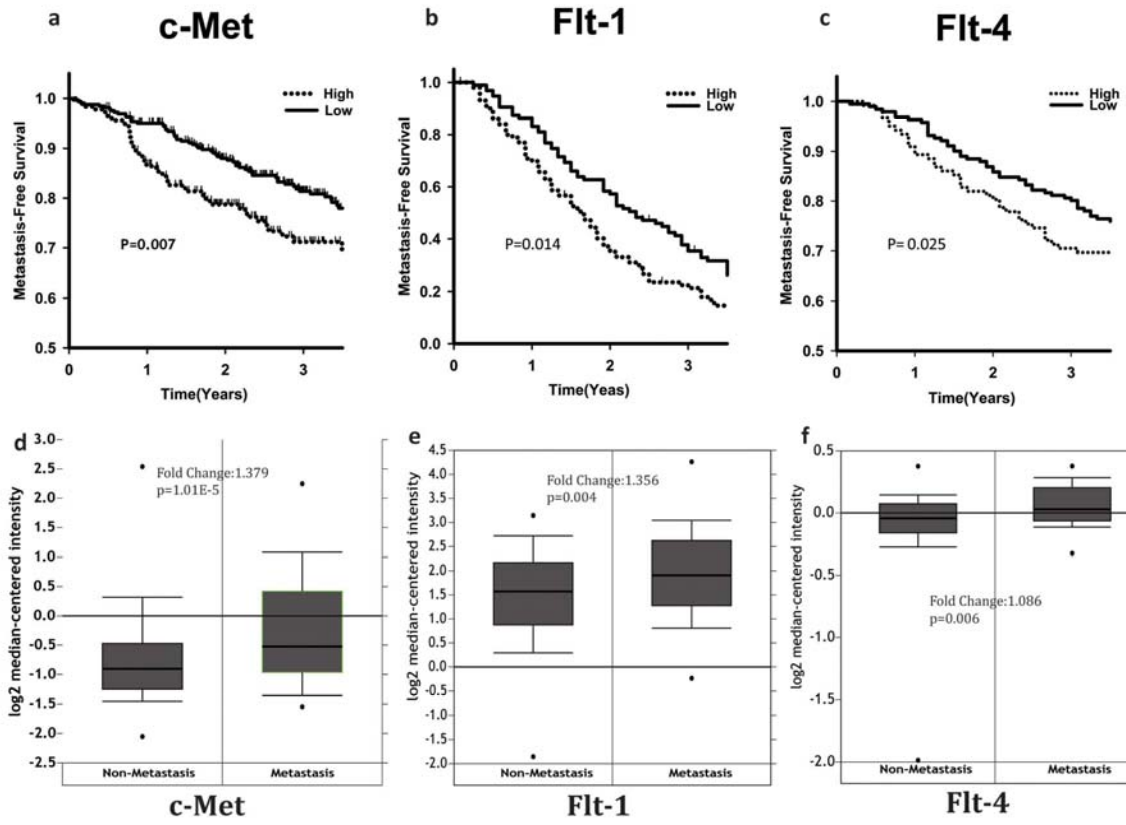

Supplement: NIHMS778393-supplement-4.pdf [file NIHMS778393-supplement-4.pdf]
